# Supplementary material
Source: bioRxiv or medRxiv preprint supplement (https://www.biorxiv.org/highwire/filestream/130472/field_highwire_adjunct_files/13/430314-7.pdf)

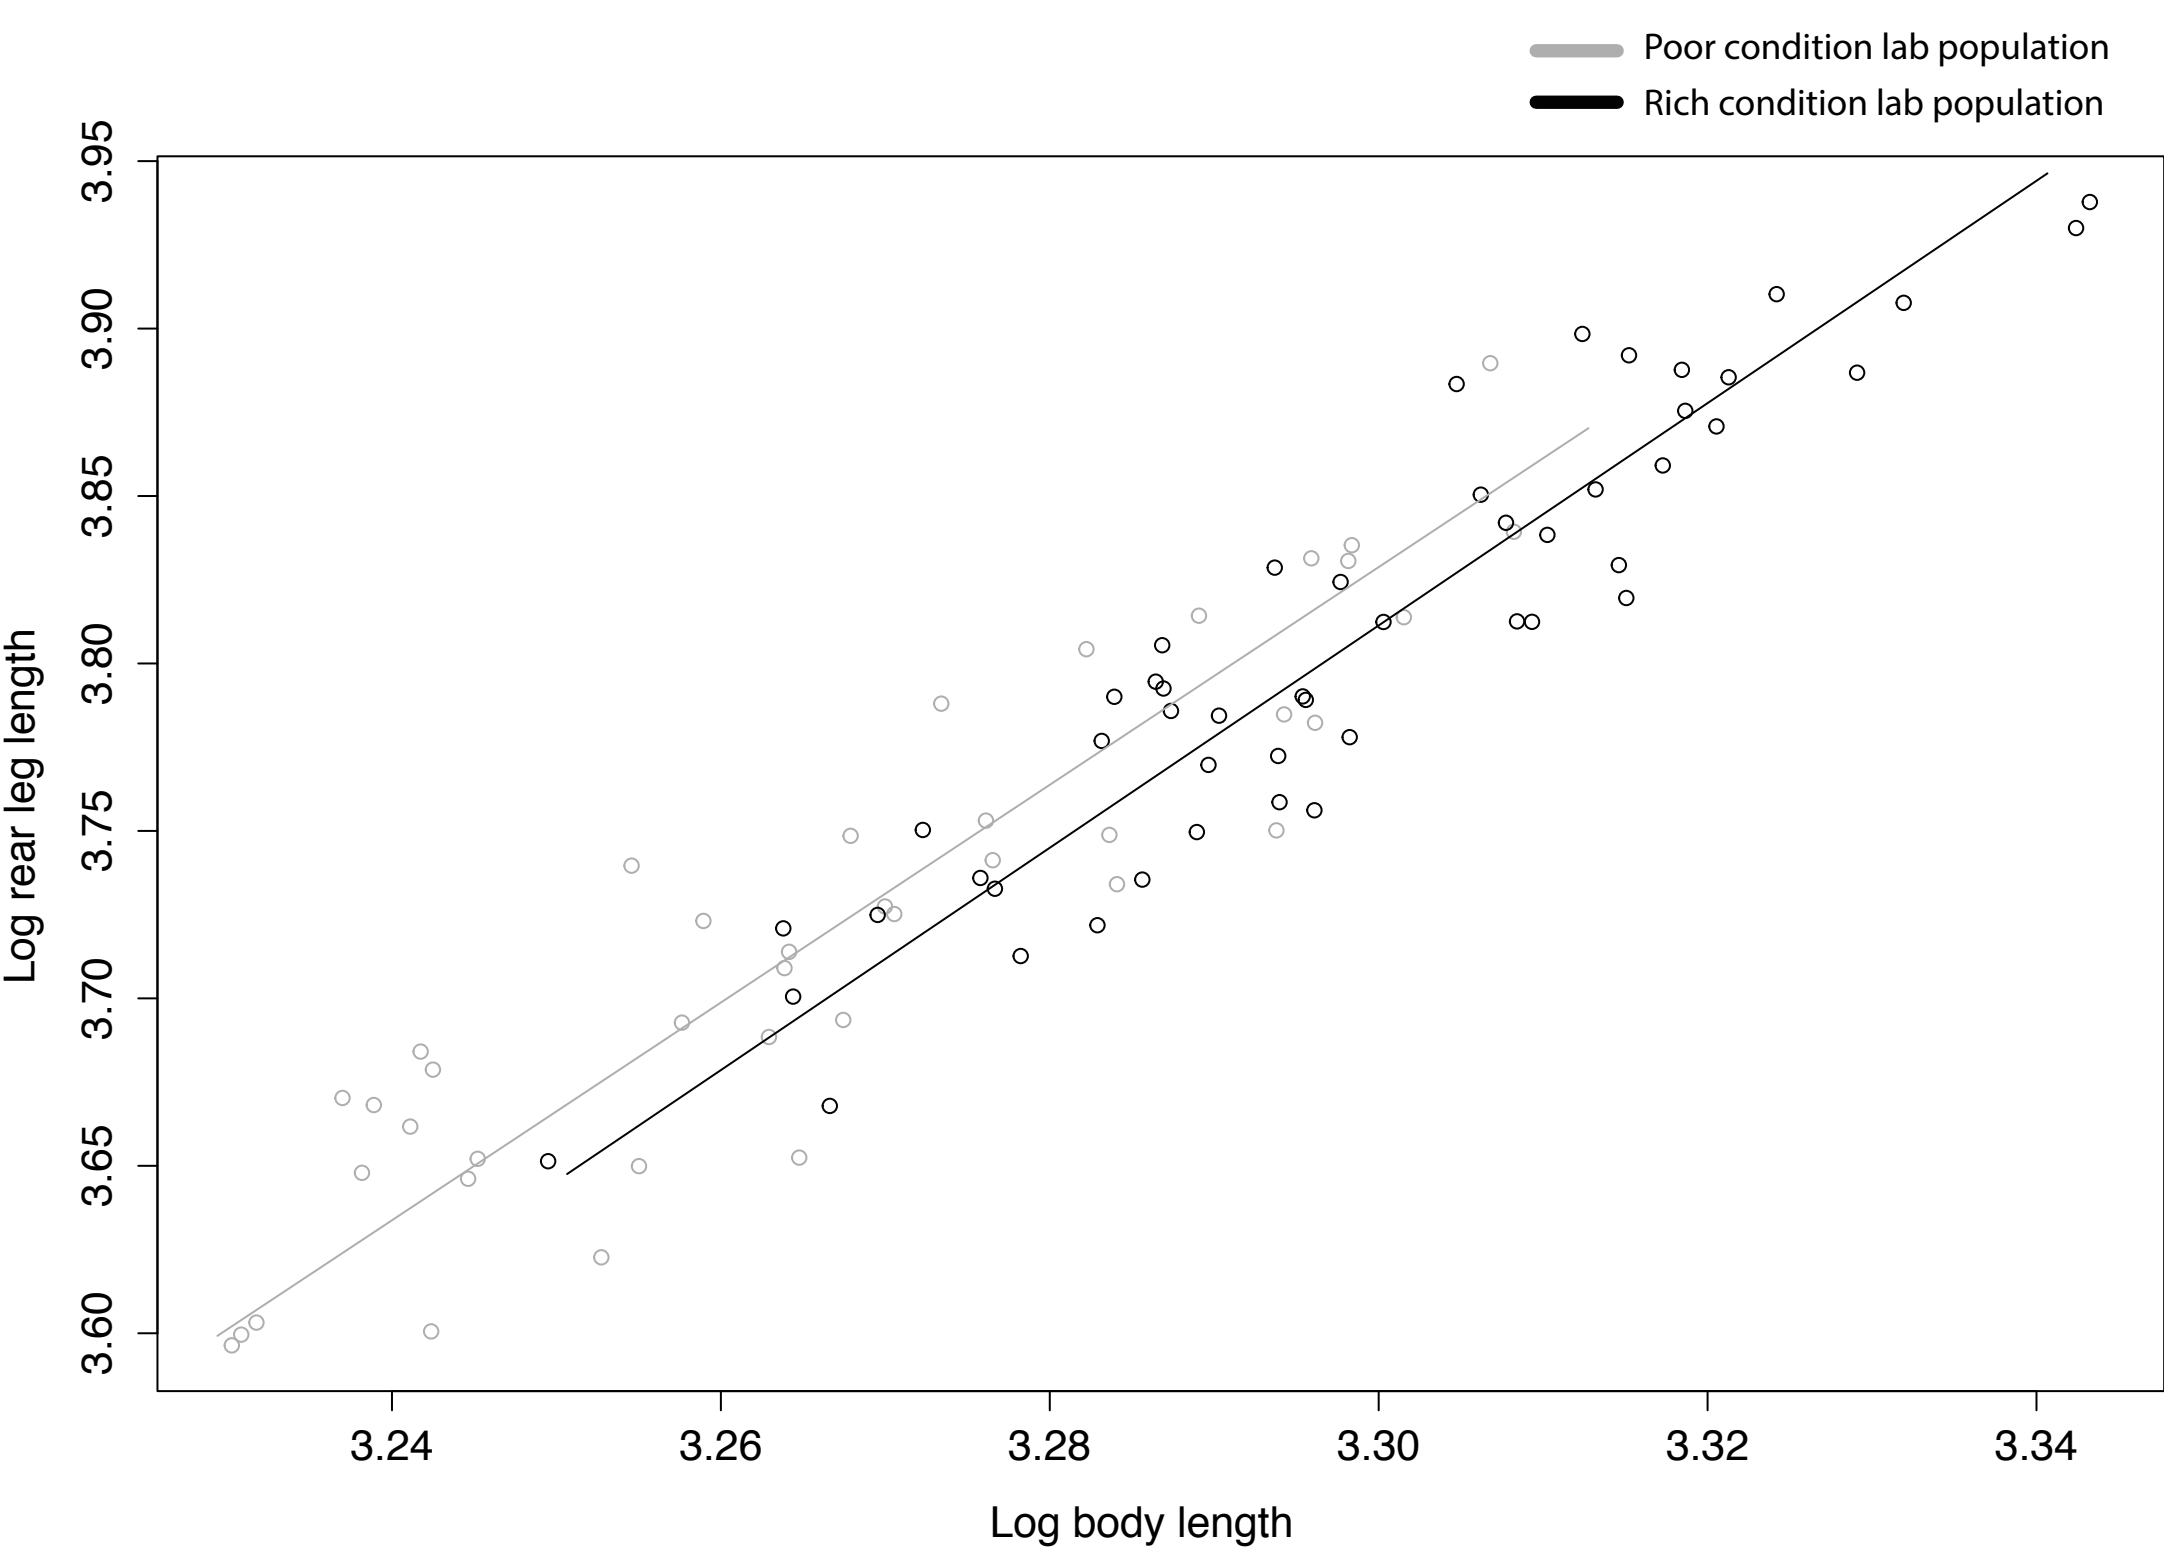

Supplement: Supplementary file [file 430314-7.pdf]
